# Supplementary material for: Ultraviolet-irradiated endothelial cells secrete stem cell factor and induce epidermal pigmentation
Source: PubMed Central journal article supplement (PMC5844989; doi:10.1038/s41598-018-22608-y), 2018-03-09
Supplement: 41598_2018_22608_MOESM1_ESM.pdf [file 41598_2018_22608_MOESM1_ESM.pdf]

## Supplementary information

Ultraviolet-irradiated endothelial cells secrete stem cell factor and induce epidermal pigmentation

Misun Kim<sup>1</sup>, Takako Shibata<sup>2</sup>, Soohyun Kwon<sup>1</sup>, Tae Jun Park<sup>3,4,5</sup>, Hee Young Kang<sup>1,5</sup>

<sup>1</sup>Department of Dermatology, Ajou University School of Medicine, Suwon, Korea

<sup>2</sup>Shiseido Global Innovation Center, Yokohama, Japan

<sup>3</sup>Department of Biochemistry and Molecular Biology, Ajou University School of Medicine, Suwon, Korea

<sup>4</sup>Chronic Inflammatory Disease Research Center, Ajou University School of Medicine, Suwon, Korea

<sup>5</sup>Department of Biomedical Science, The Graduate School, Ajou University, Suwon, Korea

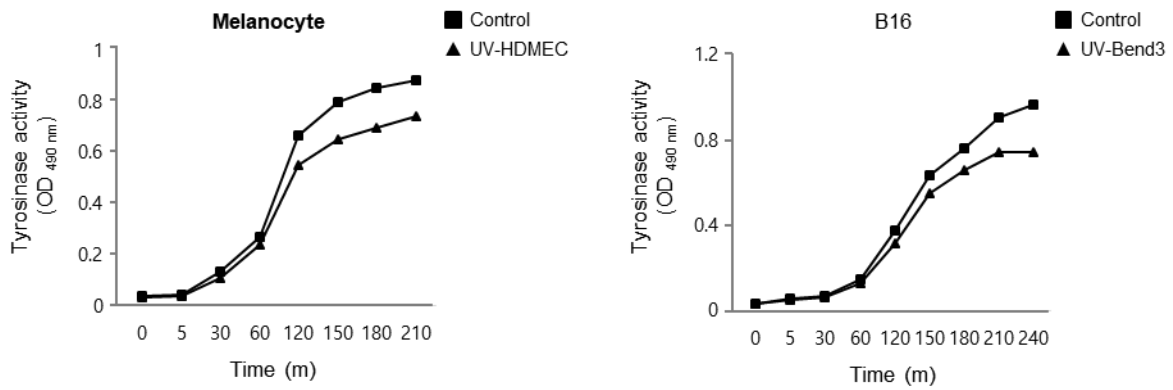

**Supplementary Figure 1. The kinetic assay of tyrosinase activity.**

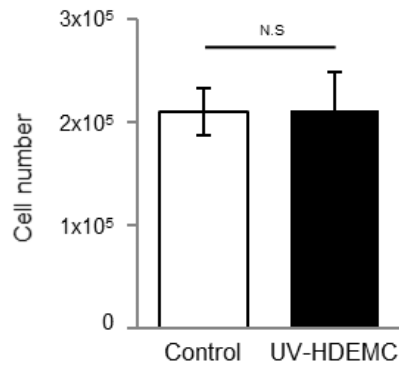

**Supplementary Figure 2. UV-irradiated endothelial cells did not affect melanocyte proliferation.**

Normal human melanocytes were treated with the conditioned medium (CM) obtained from UV-irradiated HDMECs (UV-HDMECs) and cell proliferation was measured using direct counting. N.S represents no significance.

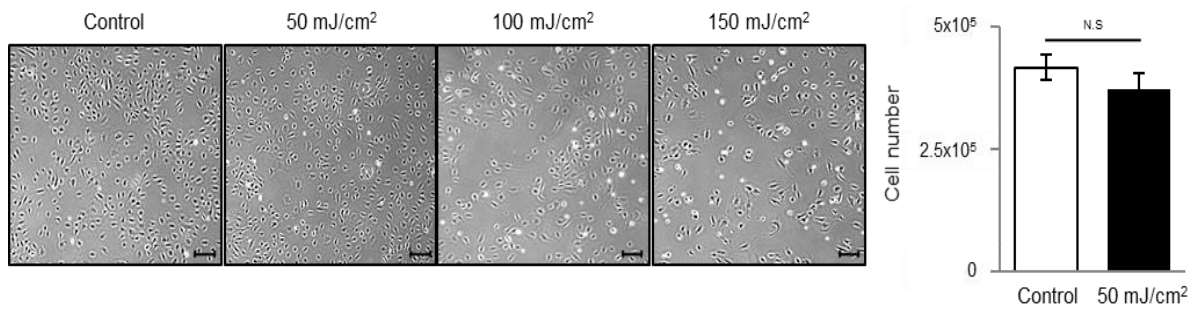

**Supplementary Figure 3. The non-cytotoxic level of UVB.**

Human endothelial cells (HDMECs) were irradiated with 50-150 J/cm<sup>2</sup> UVB. After 24 h, the cell morphology was examined and cytotoxicity was analyzed by means of direct counting.

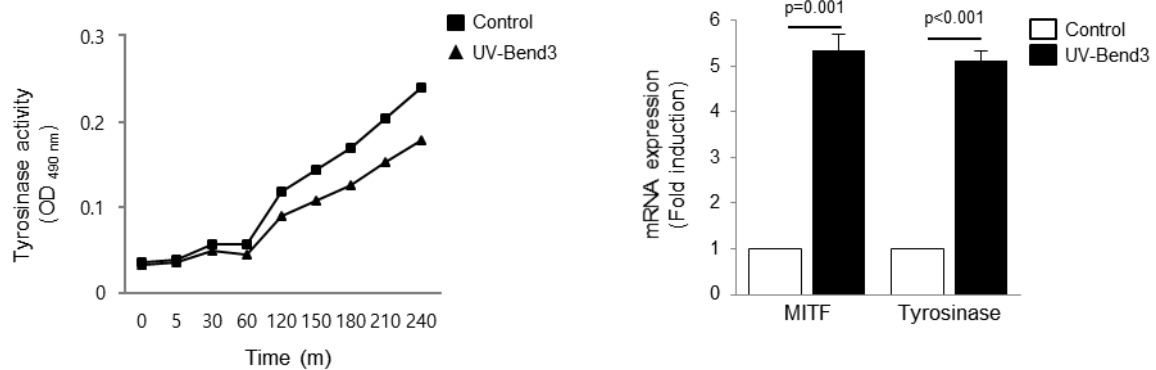

**Supplementary Figure 4. Effects of UV-irradiated endothelial cells on the pigmentation of B16 melanoma cells cultured in RPMI medium.**

A stimulatory effect of the Bend3-derived conditioned medium on melanogenesis was consistently reproduced in RPMI medium.

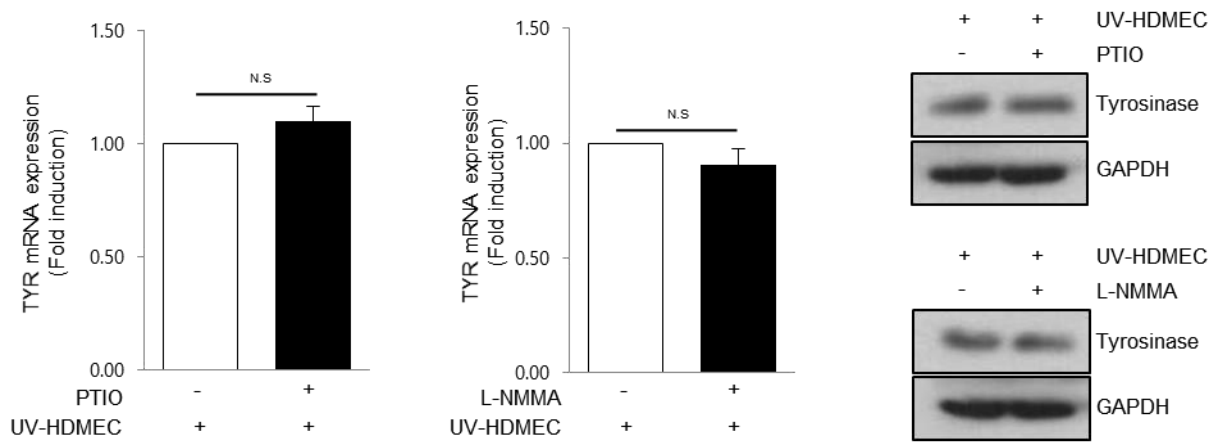

**Supplementary Figure 5. Inhibition of NO activation did not affect the pigmentation induced by UV-HDMECs.**

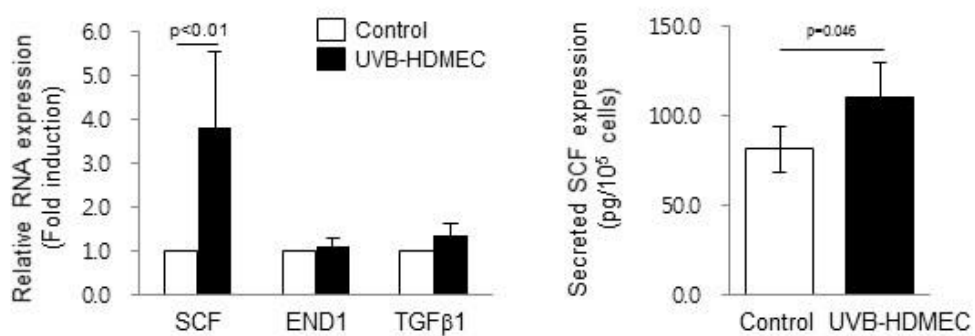

**Supplementary Figure 6. Endothelial cells secrete SCF upon UVB irradiation.**

Expression levels of the mRNA of SCF, EDN1, and TGFβ1 analyzed by real-time PCR (left panel). Levels of secreted SCF in a cultured medium measured by ELISA (right panel).

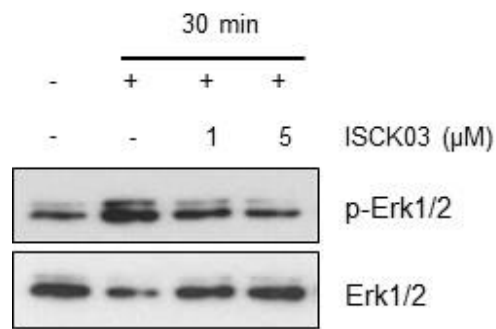

**Supplementary Figure 7. The effective dose of ISCK03 in melanocytes.**

Melanocytes were treated with a KIT-specific inhibitor (ISCK03) in conjunction with CM from UV-HDMECs. Phosphorylation of extracellular-signal-regulated kinase (Erk)1/2 was analyzed by western blotting. 5 μg/mL ISCK03 was the appropriate concentration required to inhibit Erk1/2 phosphorylation, a signaling molecule acting downstream of SCF/c-KIT in melanocytes.

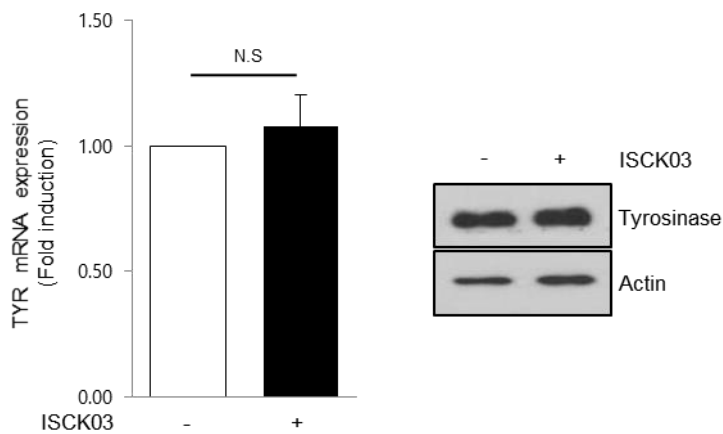

**Supplementary Figure 8. Blocking c-kit receptors with ISCK03 treatment did not affect melanogenesis in melanocytes.**

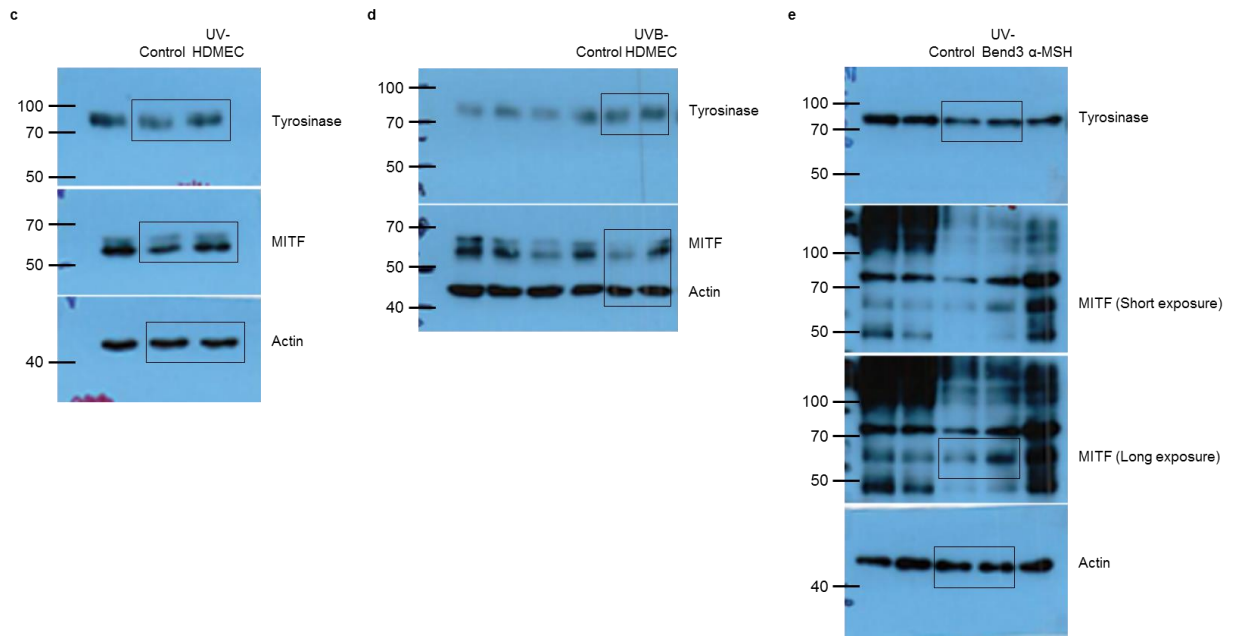

**Supplementary Figure 9. Full-length western blots for Figures 1c, 1d, and 1e.**

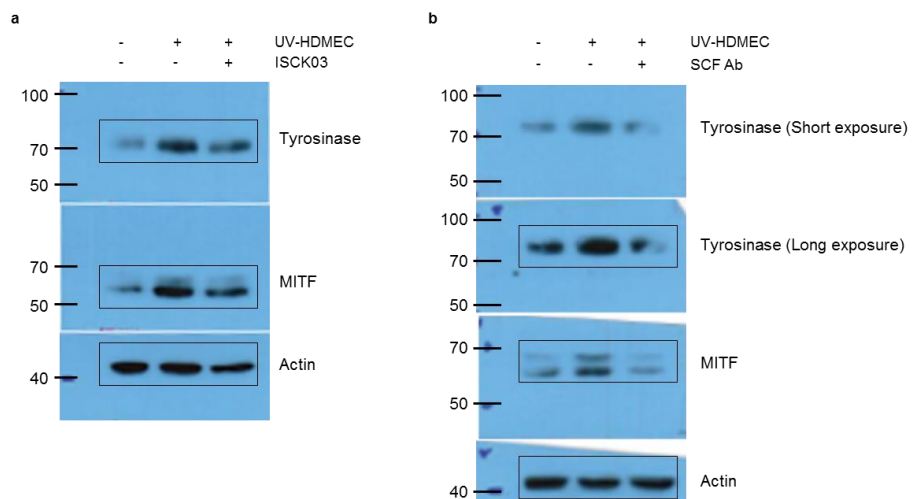

**Supplementary Figure 10. Full-length western blots for Figures 5a and 5b.**
